# Supplementary material
Source: publisher site journal article supplement (https://www.spandidos-publications.com/5759/downloadSupplementary)

Figure S1. ARC attenuates intra-serum iron concentrations. Serum iron ion concentration was measured in each group of mice using the Serum Iron Concentration Assay Kit. The absorbance of the samples was measured at 520 nm using a microplate reader. Data are presented as the mean  $\pm$  SD. \*\*\*\*P<0.0001 vs. Con. ARC, arctiin; ARC-H, ARC-high; ARC-L, ARC-low; Con, control; ID, dextran iron.

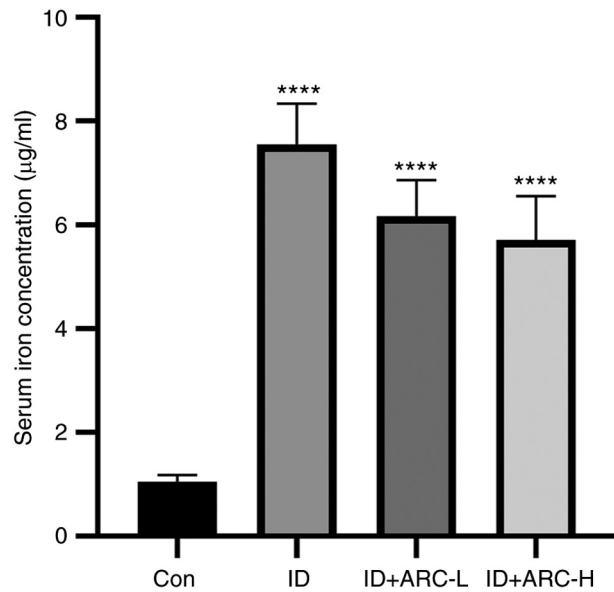

Supplement: Supplementary file 1 [file downloadSupplementary]
